# Supplementary material for: In silico prediction of the granzyme B degradome
Source: PubMed Central journal article supplement (PMC3333170; doi:10.1186/1471-2164-12-s3-s11), 2011-11-30
Supplement: 1471-2164-12-S3-S11-S2.pdf [file 1471-2164-12-S3-S11-S2.pdf]

**SVM parameter optimization:** Training sets of different sequence window datasets were trained under 10-fold cross-validation using various combinations of C and  $\gamma$  values. The optimal C and  $\gamma$  values for each training set are used to train the final SVM classifier. Optimal values are indicated below the corresponding chart.

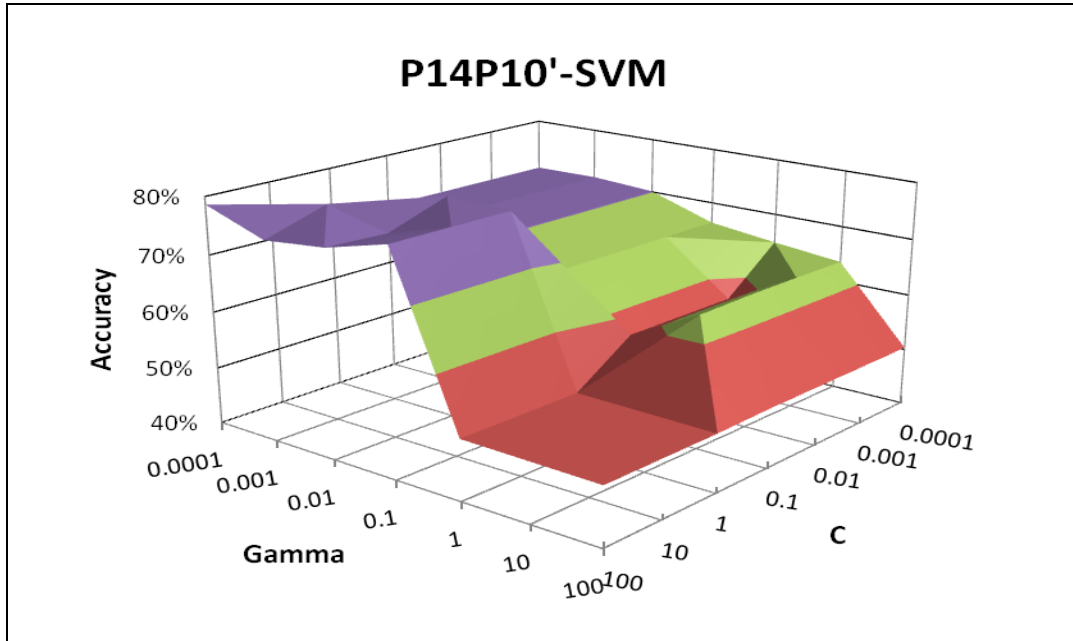

C=1 and  $\gamma = 0.01$

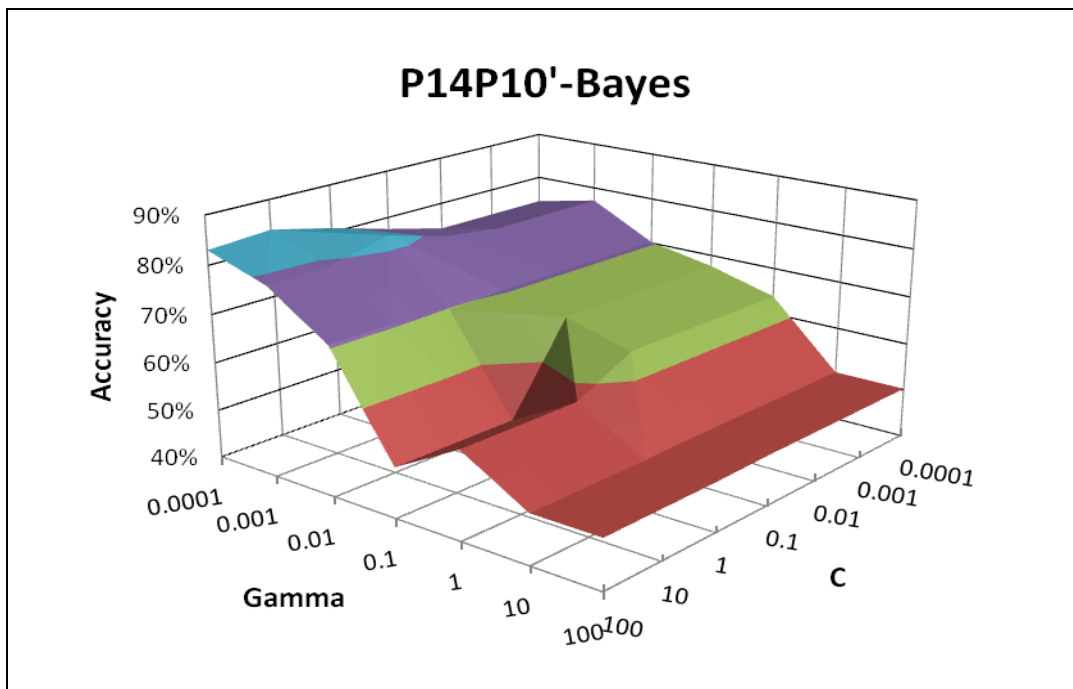

C=10 and  $\gamma = 0.0001$

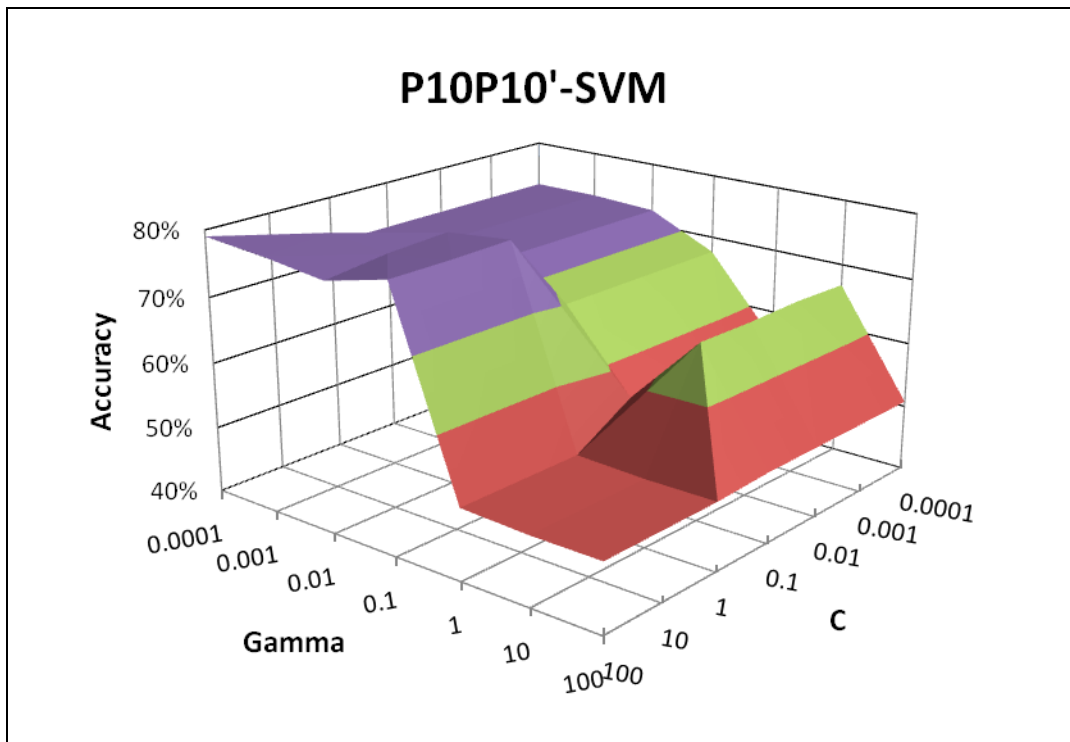

$C=1$  and  $\gamma=0.1$

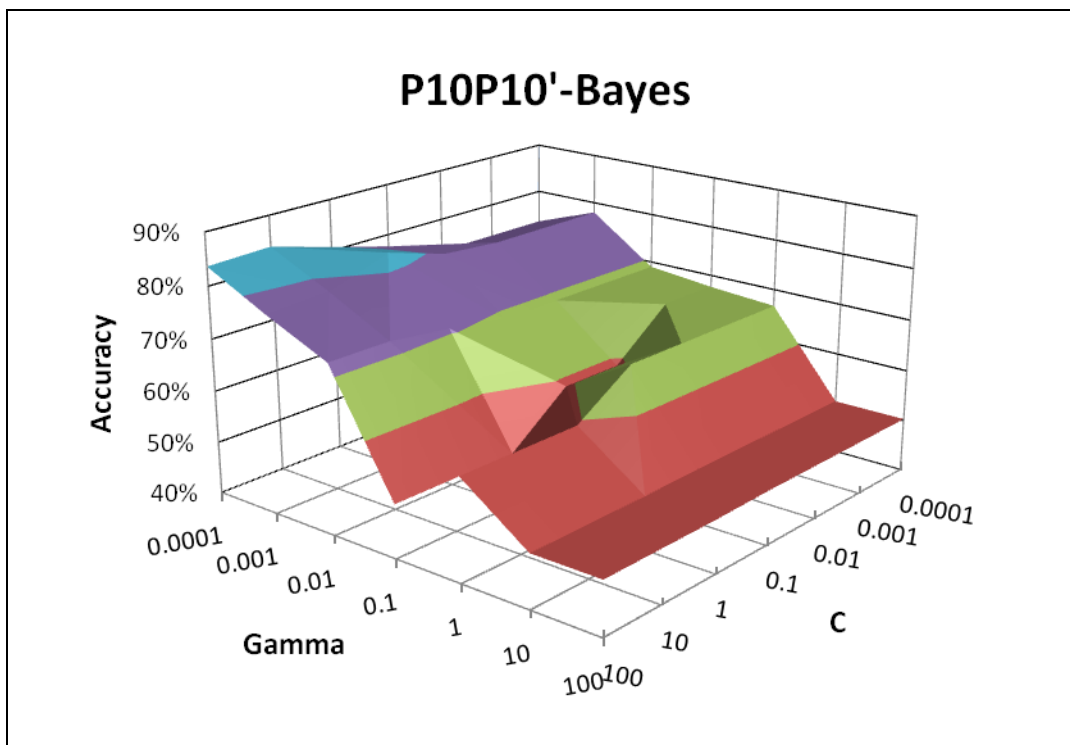

$C=10$  and  $\gamma=0.0001$

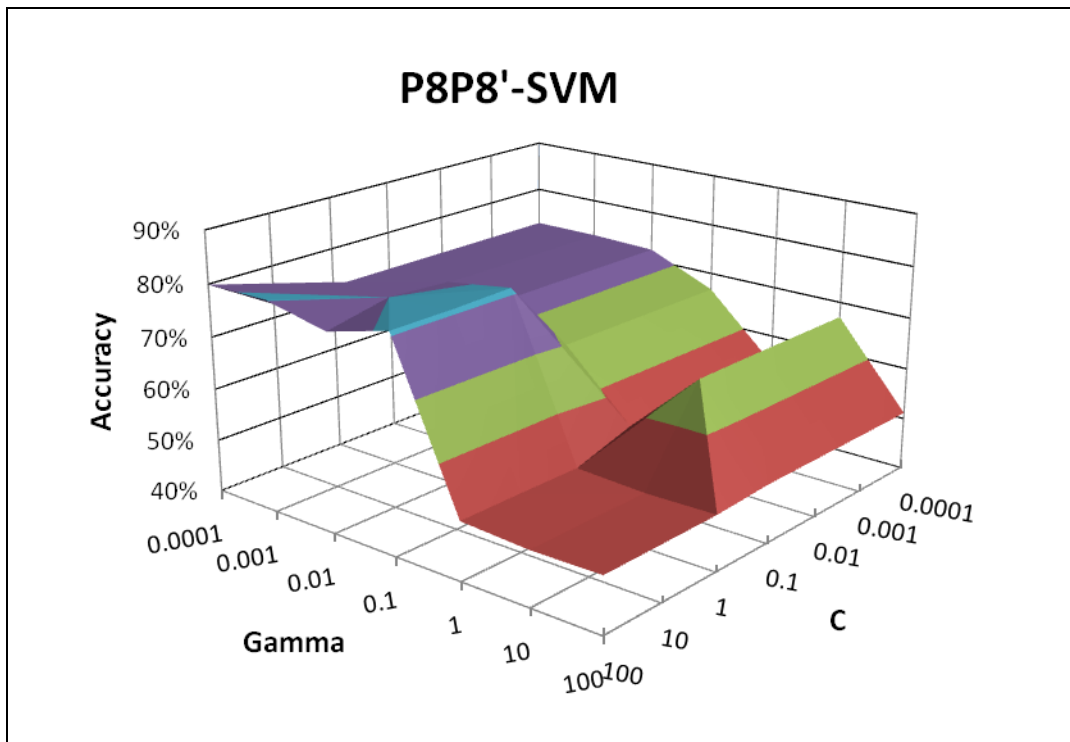

$C=1$  and  $\gamma=0.1$

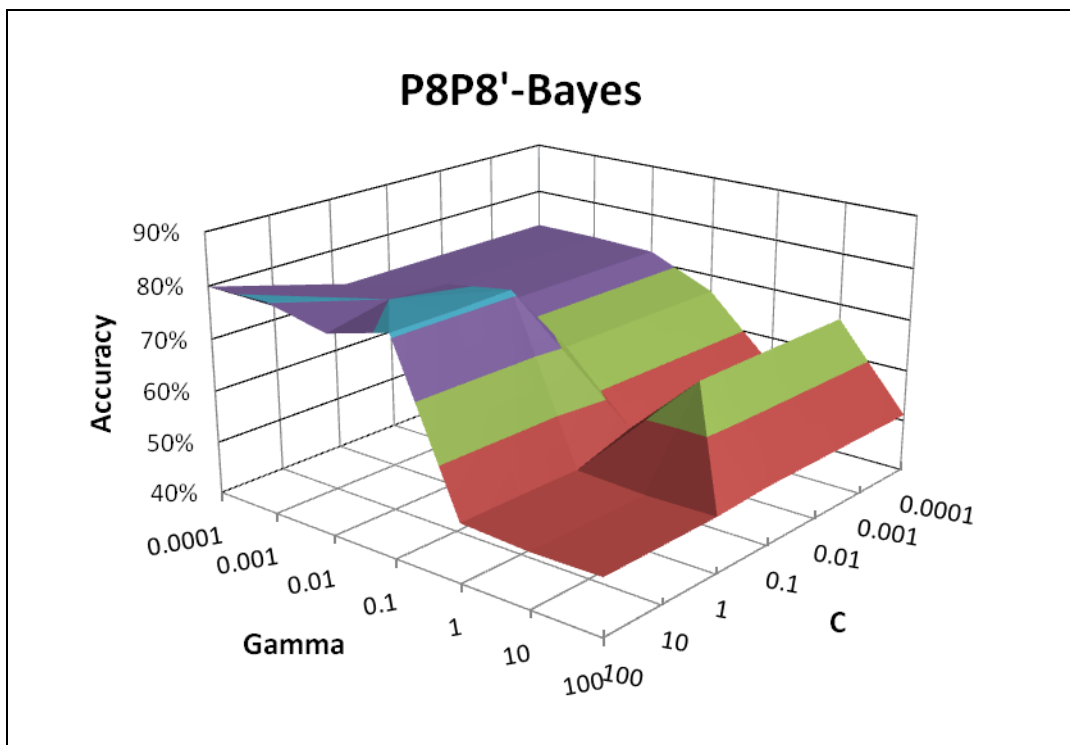

$C=100$  and  $\gamma=0.0001$

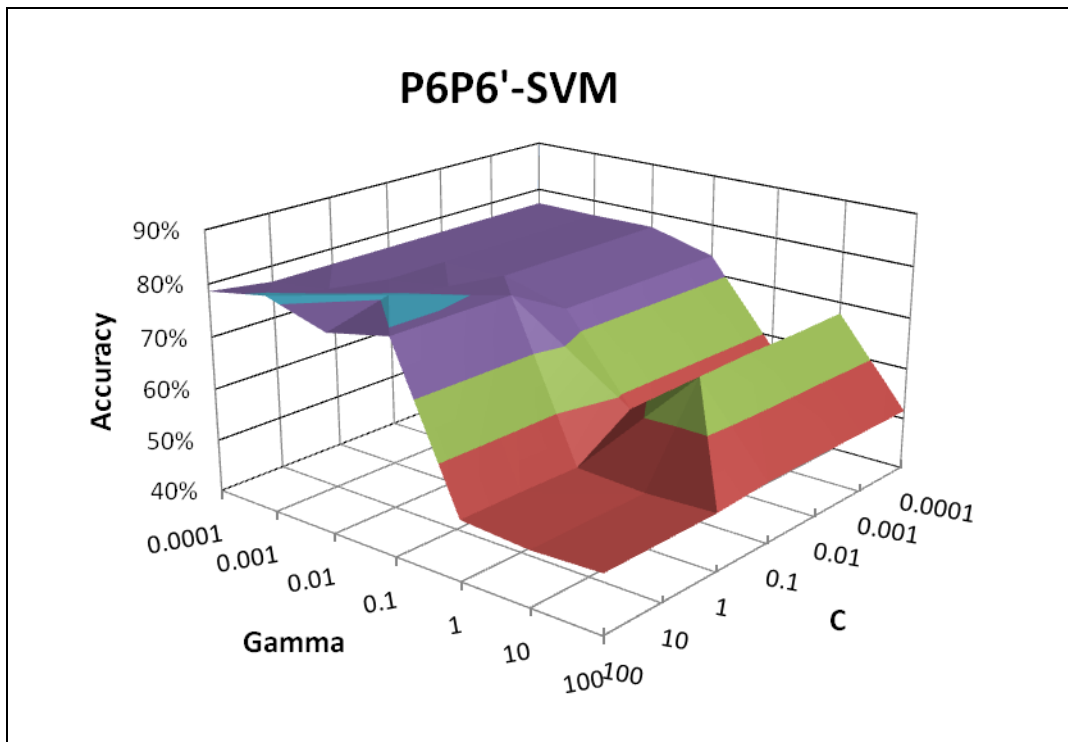

$C=100$  and  $\gamma = 0.001$

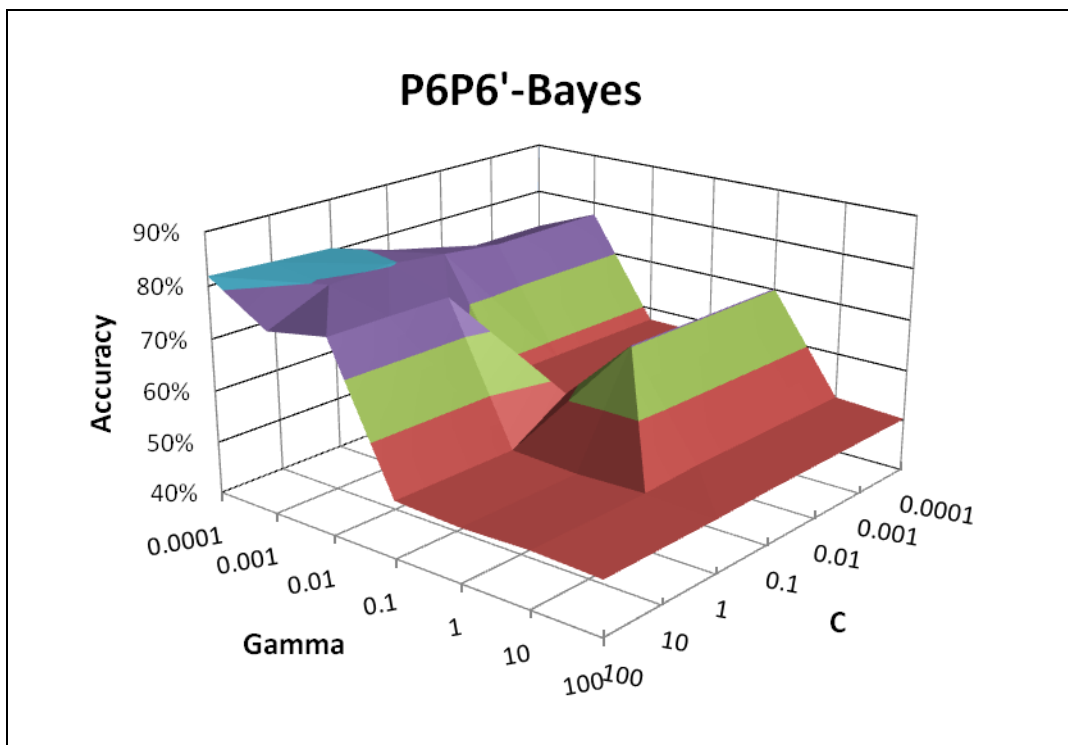

$C=100$  and  $\gamma = 0.0001$

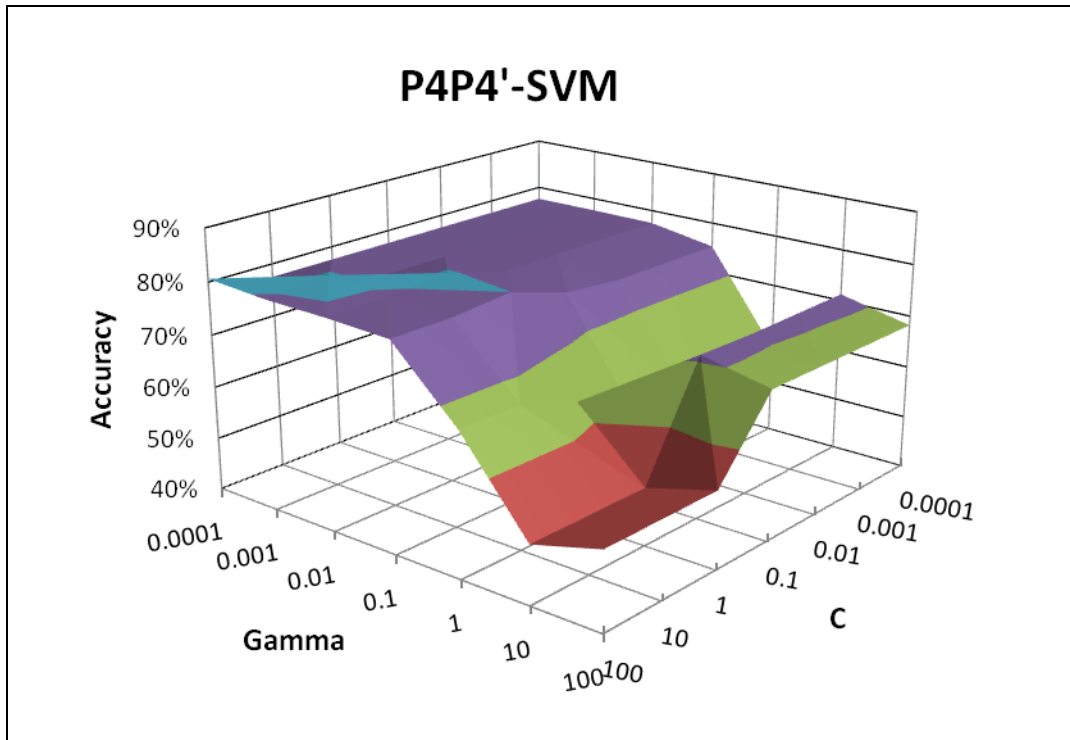

$C=10$  and  $\gamma=0.001$

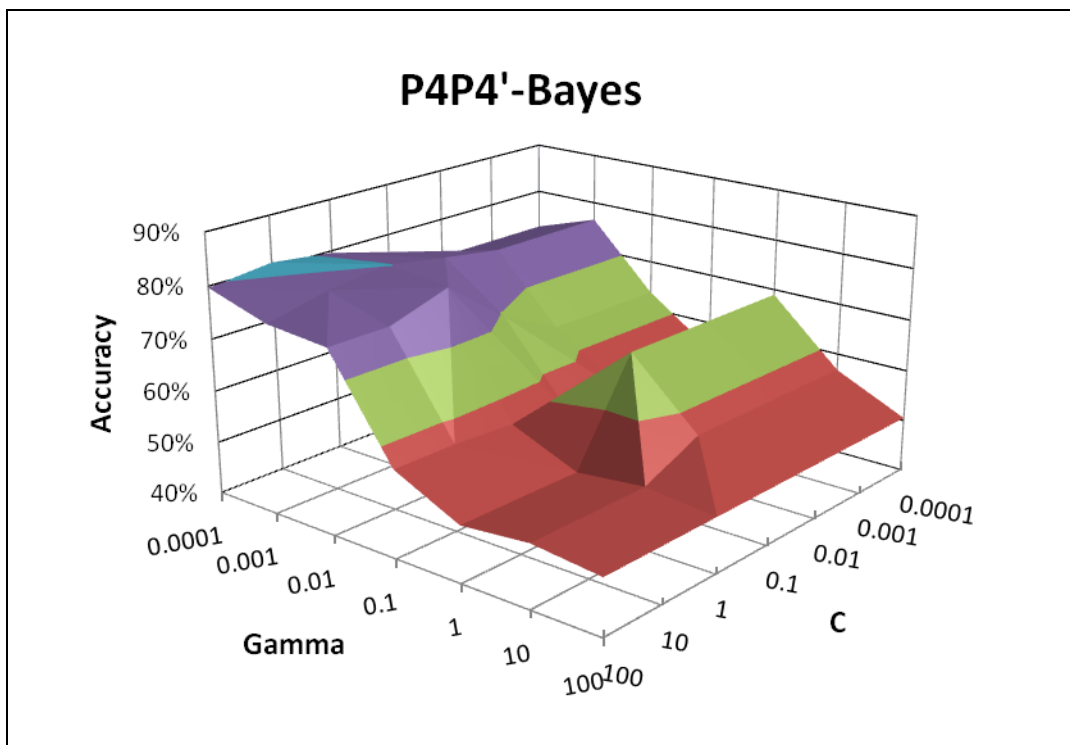

$C=10$  and  $\gamma=0.0001$

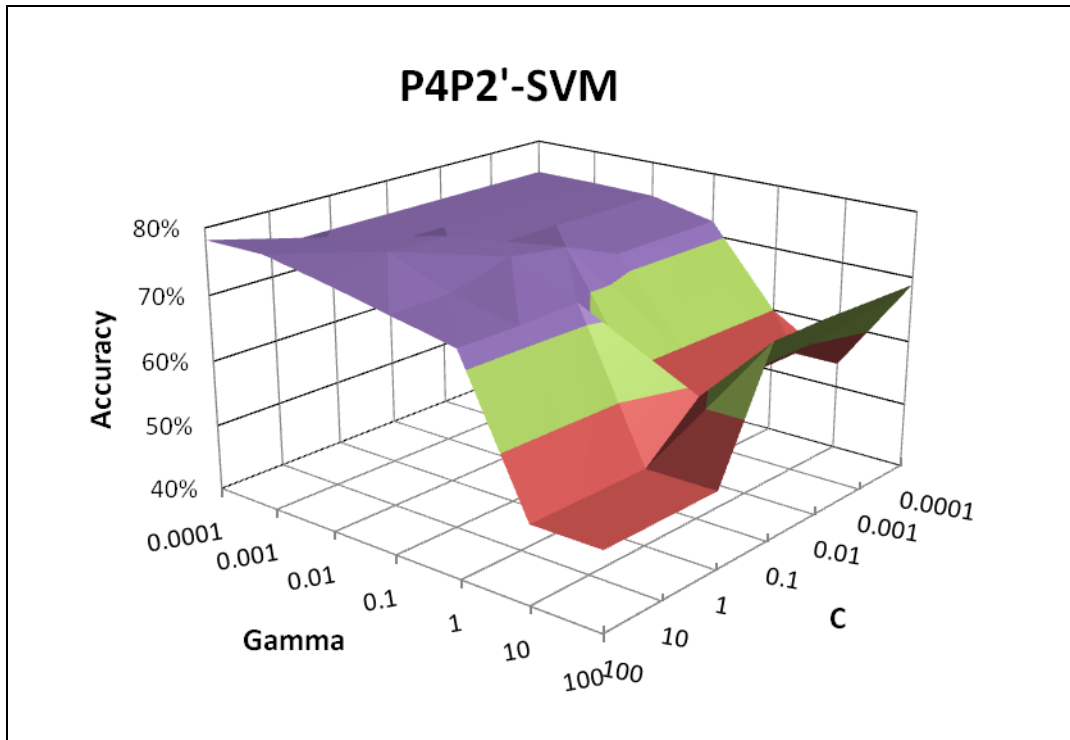

$C=100$  and  $\gamma=0.001$

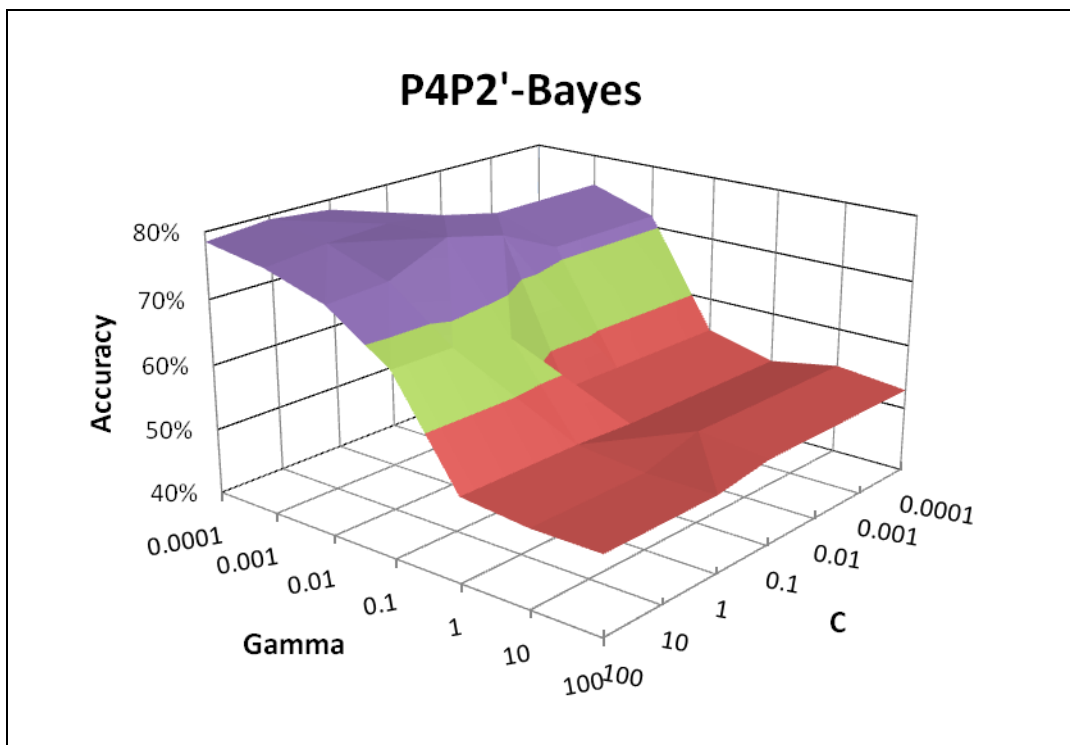

$C=10$  and  $\gamma=0.0001$

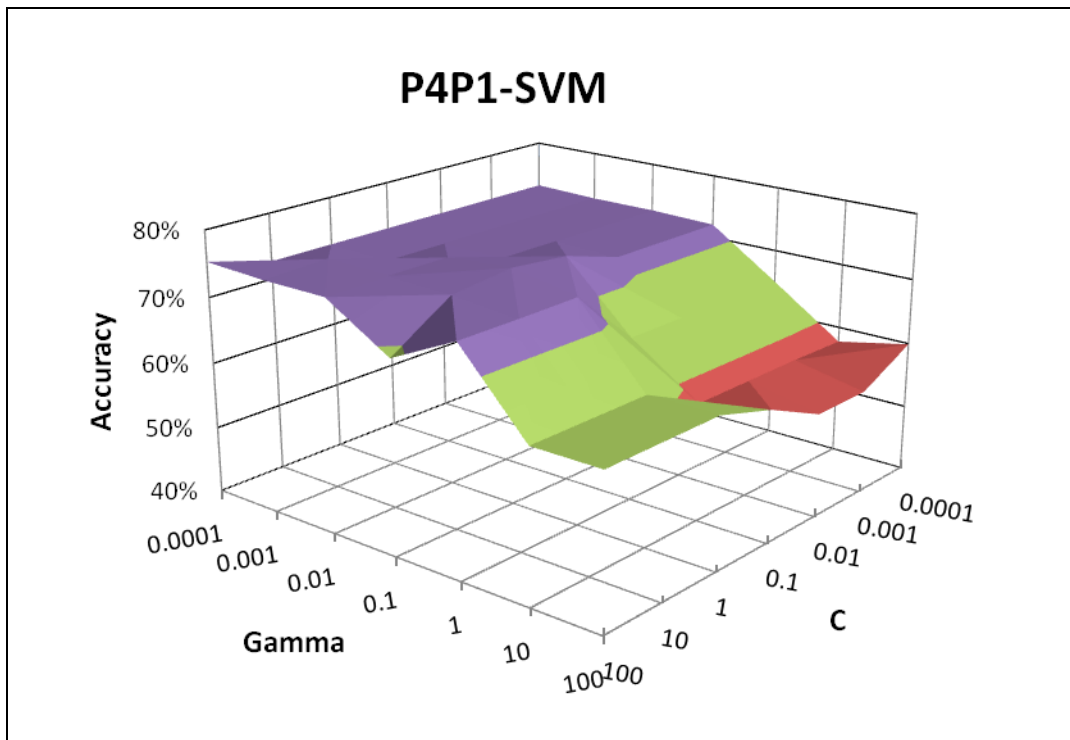

$C=1$  and  $\gamma=0.1$

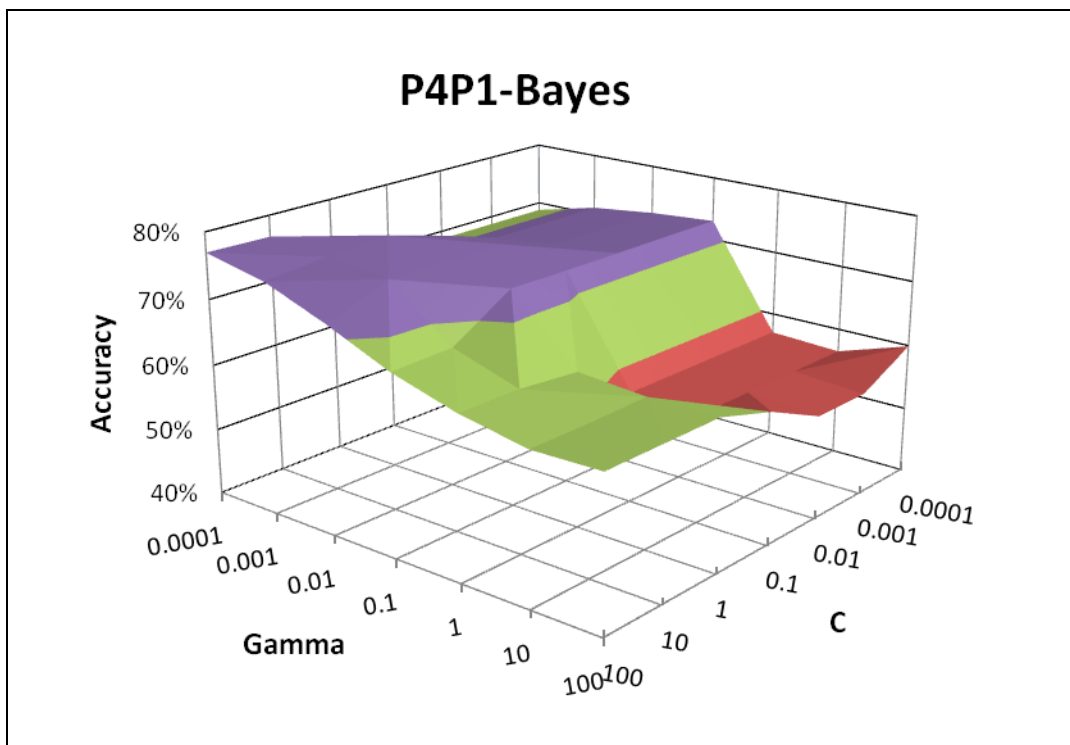

$C=100$  and  $\gamma=0.0001$

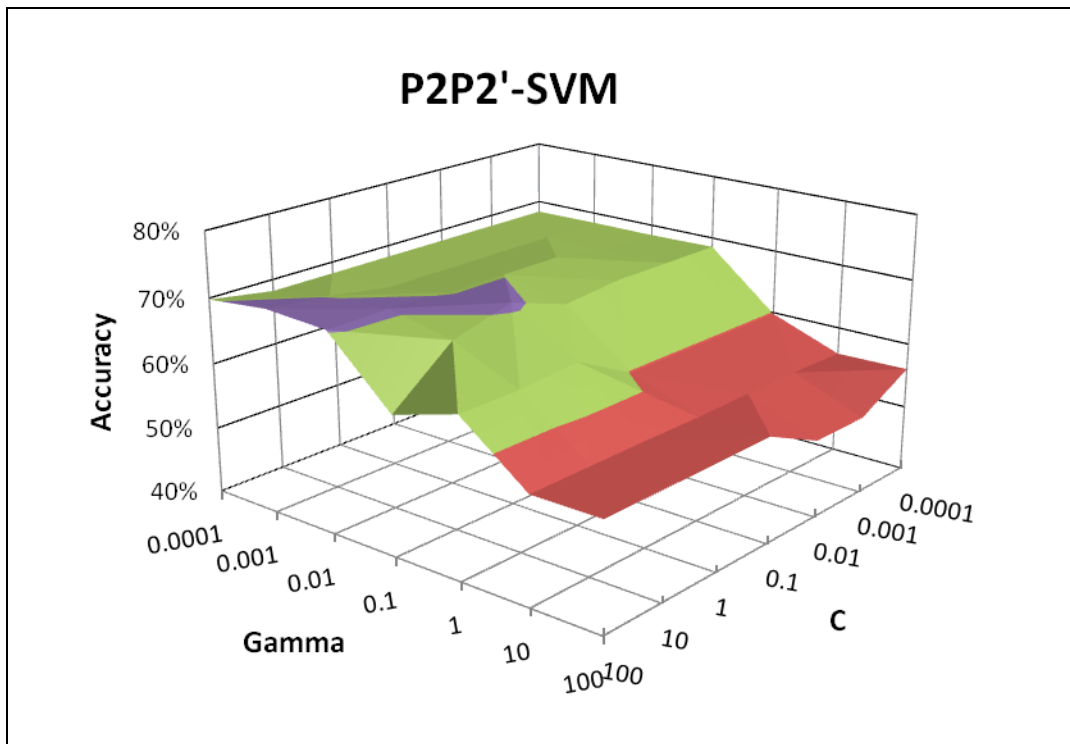

$C=100$  and  $\gamma=0.001$

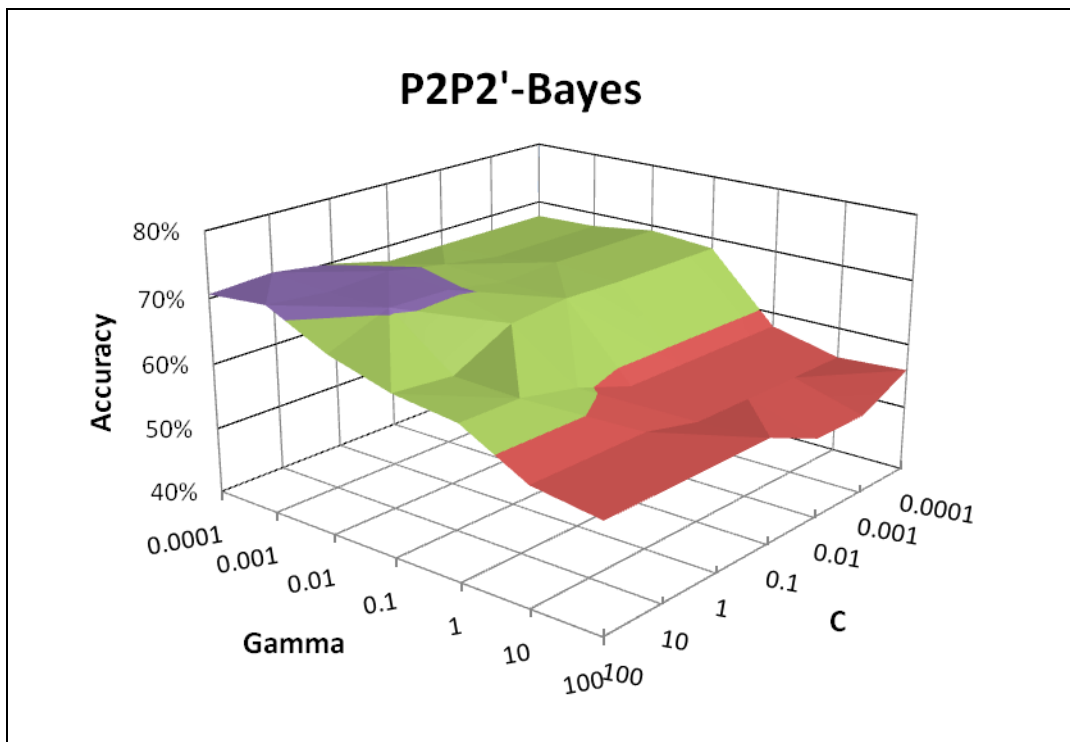

$C=100$  and  $\gamma=0.001$
